# Supplementary material for: methyl-ATAC-seq measures DNA methylation at accessible chromatin
Source: PubMed Central journal article supplement — Genome Res. 2019 Jun;29(6):969–77. doi: 10.1101/gr.245399.118 (PMC6581052; doi:10.1101/gr.245399.118), 2019-06
Supplement: supp_gr.245399.118_Supplemental_Table_S1-S3.pdf [file supp_gr.245399.118_Supplemental_Table_S1-S3.pdf]

| <b>Sample:</b>                   | <b>Trimmed sequences analyzed (M):</b> | <b>mapping:</b> | <b>duplication:</b> | <b>Conversion rate (Lambda mC/TotalC):</b> | <b>FRiP (5M reads):</b> |
|----------------------------------|----------------------------------------|-----------------|---------------------|--------------------------------------------|-------------------------|
| mATAC-seq HCT116 Replicate 1     | 32.6                                   | 45.40%          | 63.73%              | 99.76%                                     | 0.45                    |
| mATAC-seq HCT116 Replicate 2     | 25.1                                   | 46.60%          | 38.42%              | 99.54%                                     | 0.49                    |
| mATAC-seq DKO Replicate 1        | 24.6                                   | 44.70%          | 25.12%              | 98.93%                                     | 0.31                    |
| mATAC-seq DKO Replicate 2        | 23.2                                   | 46.30%          | 26.22%              | 99.35%                                     | 0.27                    |
| Omni-ATAC-seq HCT116 Replicate 1 | 15                                     | 89.30%          | 17.66%              |                                            | 0.26                    |
| Omni-ATAC-seq HCT116 Replicate 2 | 14.3                                   | 89.20%          | 18.61%              |                                            | 0.28                    |
| Omni-ATAC-seq DKO Replicate 1    | 16.5                                   | 88.50%          | 18.92%              |                                            | 0.27                    |
| Omni-ATAC-seq DKO Replicate 2    | 22.7                                   | 88.20%          | 12.84%              |                                            | 0.15                    |

**Table S1:** Samples sequenced in this study. Values show millions (M) trimmed sequences analyzed, mapping efficiency using Bismark, conversion rate of unmethylated Lambda-DNA spike-in after filtering, and Fraction of Reads in Peaks (FRiP) score in down-sampled libraries.

**Genotyping oligonucleotides:**

|                |                            |
|----------------|----------------------------|
| DNMT1-Gen-F1:  | AAACTGGCAGGTGCTAACTG       |
| DNMT1-Gen-R1:  | AGATGTGATGGTGGTTTGCC       |
| DNMT3B-Gen-F1: | TTGGTTTTGCTCAGAGCCAG       |
| DNMT3B-Gen-R1: | ACGTGTGGGCAAGAGATTTTC      |
| GAPDH-Gen-F1:  | GAAGGTGAAGGTCGGAGTC        |
| GAPDH-Gen-R1:  | GAAGATGGTGTGTTGGATTTTC     |
| GPO-3          | GGGAGCAAACAGGATTAGATACCCCT |
| MGSO:          | TGCACCATCTGTCACTCTGTAACTC  |
| VM164A:        | TGCCTCTAGATCGTATTCCC       |
| VM-164B:       | GCACTCTGTGGCATGAAGGT       |
| RB164K2:       | TGGCTCCTCCCTCTATTATCG      |

**Table S2:** Oligonucleotides used in Figure S4 to genotype and verify cell lines were ordered from Integrated DNA Technologies and purified by standard desalting.

**Tn5 oligos:**

|             |                                                                             |
|-------------|-----------------------------------------------------------------------------|
| Tn5MErev:   | /5Phos/CTGTCTTTATACACATCT                                                   |
| Tn5ME-A:    | TCGTCCGGCAGCGTCAGATGTGTATAAGAGACAG                                          |
| Tn5ME-B:    | GTCTCGTGGGCTCGGAGATGTGTATAAGAGACAG                                          |
| Tn5ME-A_mC: | T/iMe-dC/GT/iMe-dC/GG/iMe-dC/AG/iMe-dC/GT/iMe-dC/AGATGTGTATAAGAGA/iMe-dC/AG |
| Tn5ME-B_mC: | GT/iMe-dC/T/iMe-dC/GTGGG/iMe-dC/T/iMe-dC/GGAGATGTGTATAAGAGA/iMe-dC/AG       |
| i7 Primers: | CAAGCAGAAGACGGCATAACGAGAT[i7]GTCTCGTGGGCTCGG                                |
| i5 Primers: | AATGATACGGCGACCACCGAGATCTACAC[i5]TCGTCCGGCAGCGTC                            |

**Table S3:** Oligonucleotides used to assemble Transposomes and PCR libraries were ordered from Integrated DNA Technologies and purified by standard desalting. '/iMe-dC/' represents an internal methylated dC. '/5Phos/' represents a 5' phosphate. '[i7]' represents Nextera i7 barcodes. '[i5]' represents Nextera i5 barcodes.
